# Supplementary material for: A Combination of Peppermint Oil and Caraway Oil for the Treatment of Functional Dyspepsia: A Systematic Review and Meta-Analysis
Source: Hindawi journal article supplement (doi:10.1155/2019/7654947), 2019-11-14
Supplement: f1 [file 7654947.f1.zip]

## a combination of peppermint oil and caraway oil compared to placebo for functional dyspepsia

**Patient or population:** patients with functional dyspepsia

**Settings:** Outpatients

**Intervention:** a combination of peppermint oil and caraway oil

**Comparison:** placebo

| Outcomes                          | Illustrative comparative risks*<br>(95% CI) |                                                       | Relative effect<br>(95% CI) | No of<br>Participants<br>(studies) | Quality of<br>the<br>evidence<br>(GRADE) | Comments                                                                   |
|-----------------------------------|---------------------------------------------|-------------------------------------------------------|-----------------------------|------------------------------------|------------------------------------------|----------------------------------------------------------------------------|
|                                   | Assumed risk                                | Corresponding risk                                    |                             |                                    |                                          |                                                                            |
|                                   | Placebo                                     | a combination of<br>peppermint oil and<br>caraway oil |                             |                                    |                                          |                                                                            |
| global improvement of FD symptoms | 744 per 1000                                | 439 per 1000<br>(365 to 528)                          | RR 0.59<br>(0.49 to 0.71)   | 350<br>(4 studies)                 | ⊕⊕⊕⊖<br>low <sup>1,2</sup>               | measurement of not much or very much symptom improvement by the physician. |
| Improvement in epigastric pain    | 519 per 1000                                | 836 per 1000<br>(664 to 1000)                         | RR 1.61<br>(1.28 to 2.03)   | 159<br>(2 studies)                 | ⊕⊕⊕⊖<br>low <sup>1,2</sup>               |                                                                            |
| Adverse events                    | 141 per 1000                                | 167 per 1000<br>(113 to 243)                          | RR 1.18<br>(0.8 to 1.72)    | 578<br>(5 studies)                 | ⊕⊖⊖⊖<br>very low <sup>1,3</sup>          |                                                                            |

\*The basis for the **assumed risk** (e.g. the median control group risk across studies) is provided in footnotes. The **corresponding risk** (and its 95% confidence interval) is based on the assumed risk in the comparison group and the **relative effect** of the intervention (and its 95% CI).

**CI:** Confidence interval; **RR:** Risk ratio;

GRADE Working Group grades of evidence

**High quality:** Further research is very unlikely to change our confidence in the estimate of effect.

**Moderate quality:** Further research is likely to have an important impact on our confidence in the estimate of effect and may change the estimate.

**Low quality:** Further research is very likely to have an important impact on our confidence in the estimate of effect and is likely to change the estimate.

**Very low quality:** We are very uncertain about the estimate.

<sup>1</sup> downgraded one level due to study limitations: one study were considered to be high risk of bias

<sup>2</sup> Downgraded one levels due to serious imprecision: very few events

<sup>3</sup> Downgraded two levels due to very serious imprecision: 95% CI of pooled data included no effect and very few events.
