# Supplementary material for: A Combination of Peppermint Oil and Caraway Oil for the Treatment of Functional Dyspepsia: A Systematic Review and Meta-Analysis
Source: Evid Based Complement Alternat Med. 2019 Nov 14;2019:7654947. doi: 10.1155/2019/7654947 (PMC6885176; doi:10.1155/2019/7654947)
Supplement: Supplementary Materials — Table S1: PRISMA checklist. Table S2: summary of findings. The file illustrates the quality of the evidence by the GRADE system. Search strategy S1: the file describes the search strategies performed by using a combination of subject headings and text words relating to dyspepsia, caraway oil, and peppermint oil. [file 7654947.f1.zip]

Archive with 3 entries (3 files):
- 7654947.f1/search strategy S1.pdf
- 7654947.f1/Table S1_PRISMA Checklist.doc
- 7654947.f1/Table S2_Summary of Findings.pdf
